# Supplementary material for: Distinct lateral inhibitory circuits drive parallel processing of sensory information in the mammalian olfactory bulb
Source: eLife journal article supplement (doi:10.7554/elife.16039), 2016-06-28
Supplement: supp [file elife-16039-supp-v1.zip]

Strongly activated deep GC

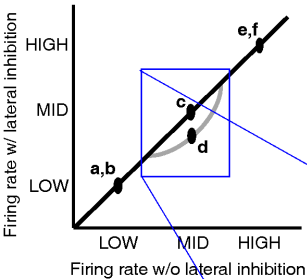

— w/ lateral inhibition (M72 stim)

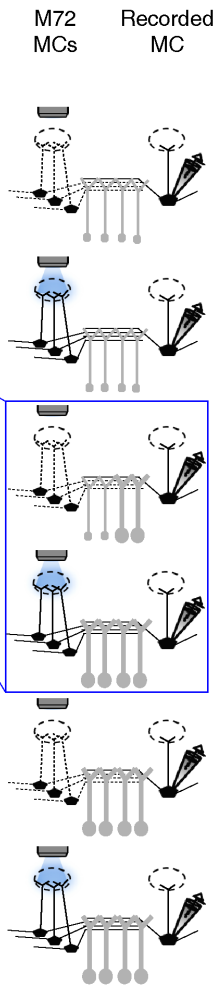

|               |          |
|---------------|----------|
| Recorded cell | ON/OFF   |
| FR            | M72 stim |

**LOW      OFF**

LOW ON

**MID C OFF**

MID <sup>d</sup> ON

**HIGH      OFF**

**HIGH <sup>f</sup> ON**

## Tufted cells

Strongly activated superficial GC

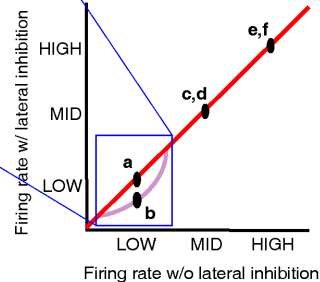

— w/ lateral inhibition (M72 stim)
