# Supplementary material for: Distinct lateral inhibitory circuits drive parallel processing of sensory information in the mammalian olfactory bulb
Source: eLife journal article supplement (doi:10.7554/elife.16039), 2016-06-28
Supplement: supp [file elife-16039-supp-v1.zip]

input image

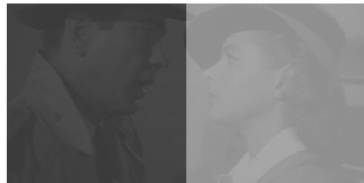

What is this?

population 1 (ADLI at low rates)

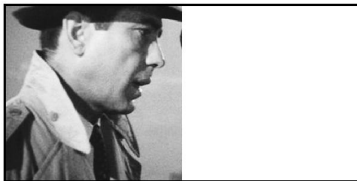

That's Humphrey Bogart.

population 2 (ADLI at int. rates)

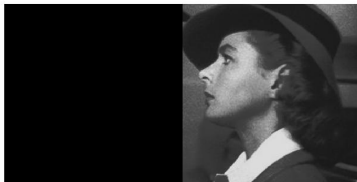

That's Ingrid Bergman.

Hypothetical image produced if a population of neurons integrates inputs from parallel channels.

average image

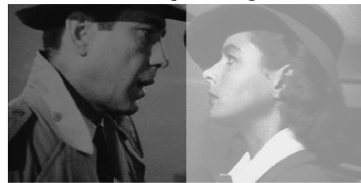

Here's looking at you, kid.
