# Supplementary figures and images for: Distinct lateral inhibitory circuits drive parallel processing of sensory information in the mammalian olfactory bulb
Source: eLife journal article supplement (doi:10.7554/elife.16039), 2016-06-28

Mitral cell (MC)  
examples

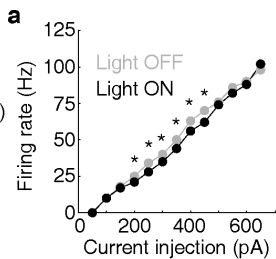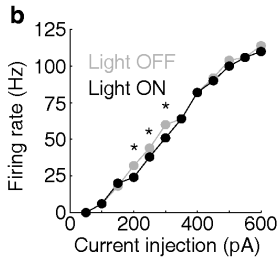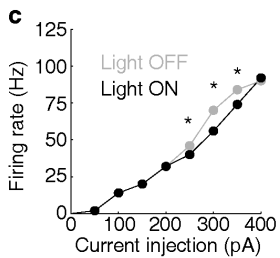

Tufted cell (TC)  
examples

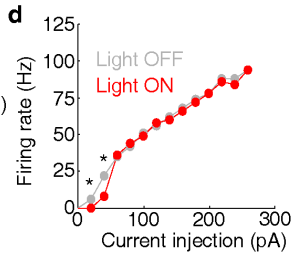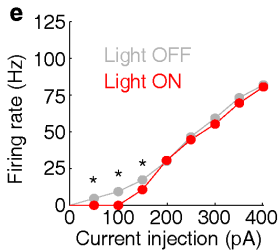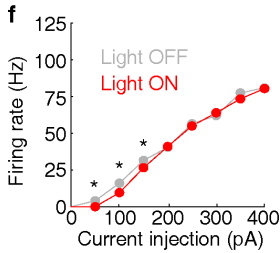

Supplement: supp [file elife-16039-supp-v1.zip]

M72-ChR2-EYFP  
evoked effects on spiking  
(Data from Fig. 3)

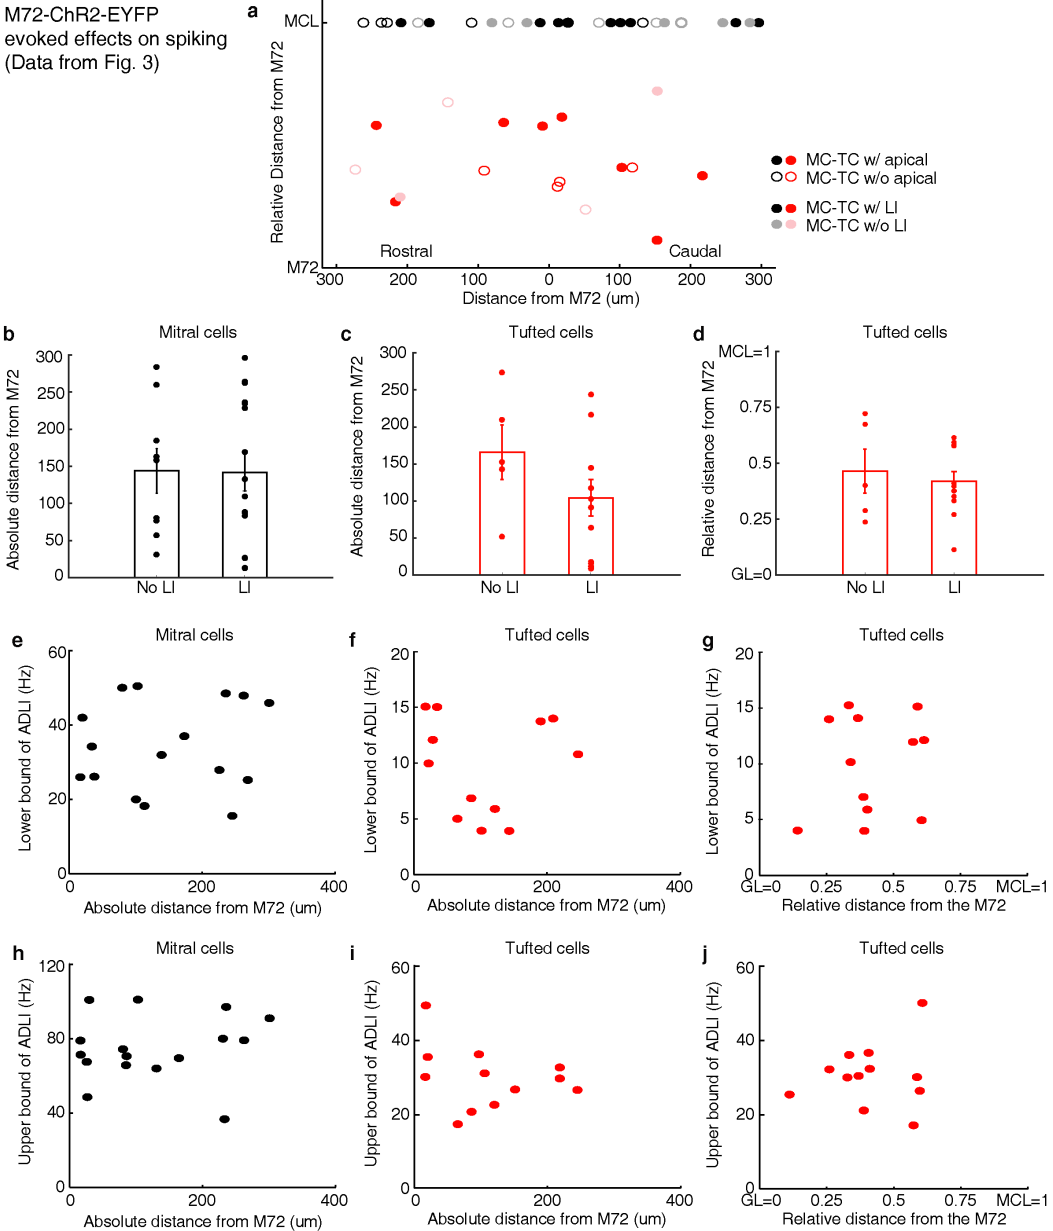

Supplement: supp [file elife-16039-supp-v1.zip]

M72-ChR2-EYFP  
evoked IPSCs  
(Data from Fig. 1a-g)

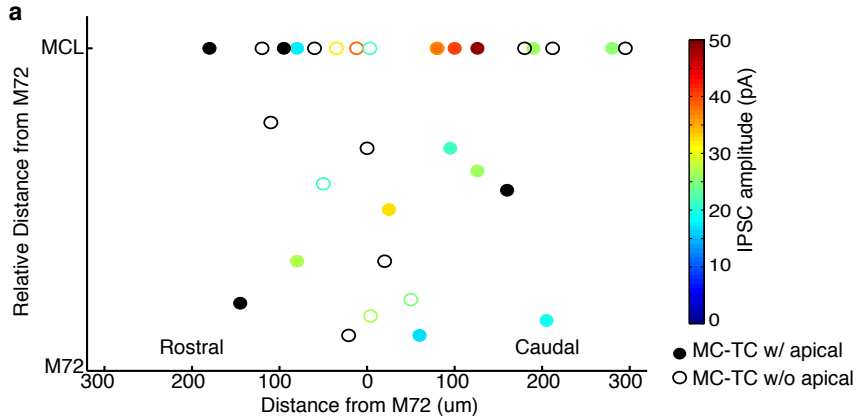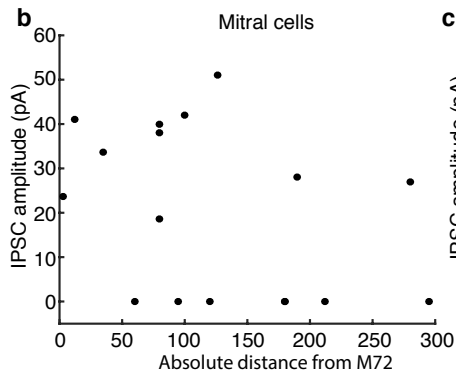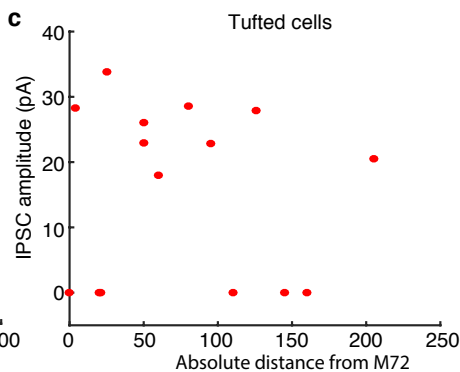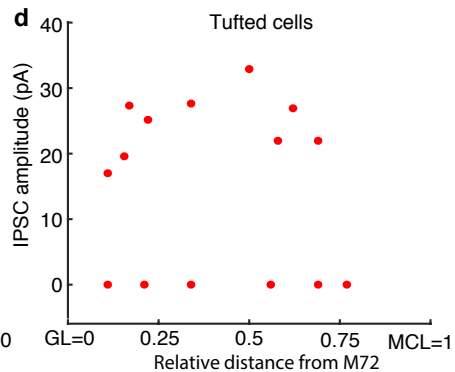

Supplement: supp [file elife-16039-supp-v1.zip]

# Subtractive/Divisive lateral inhibition (Sub./Div. inhib.)

**a**

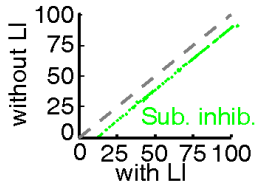

**b**

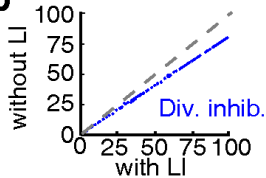

**c**

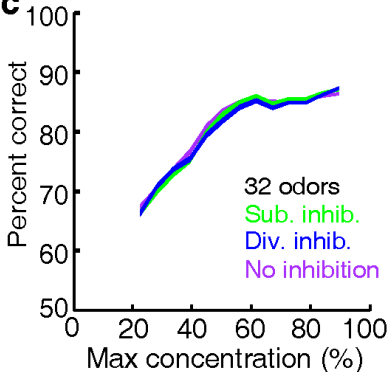

Supplement: supp [file elife-16039-supp-v1.zip]

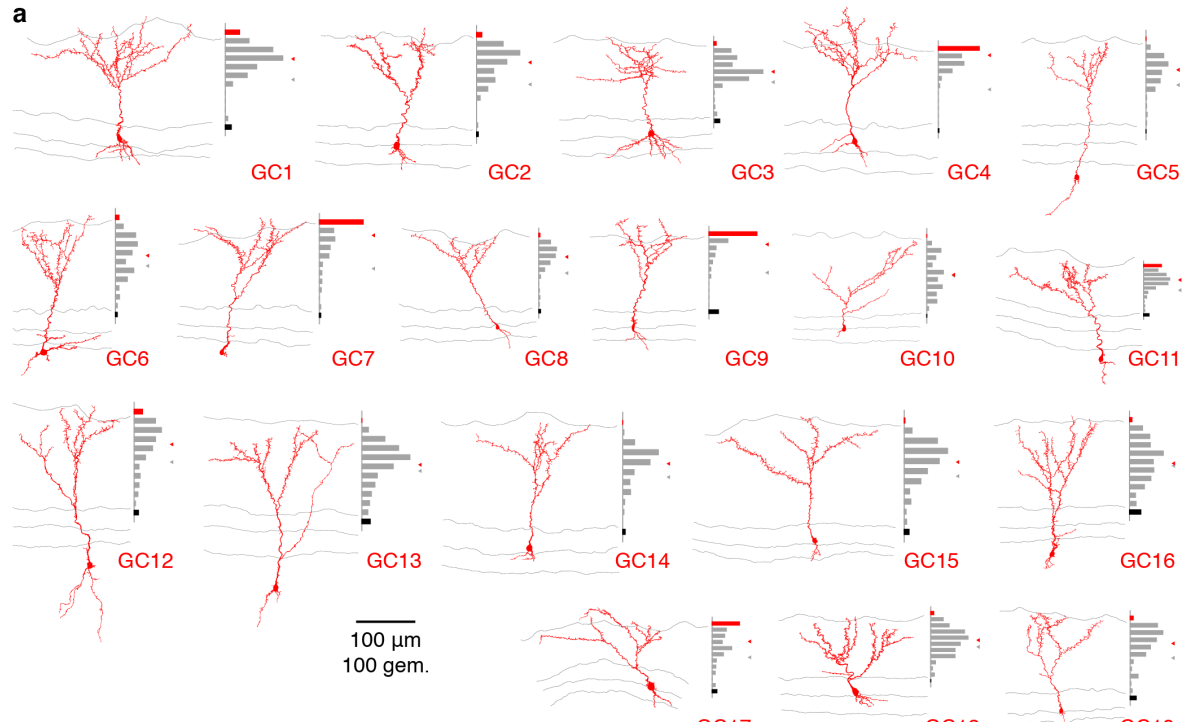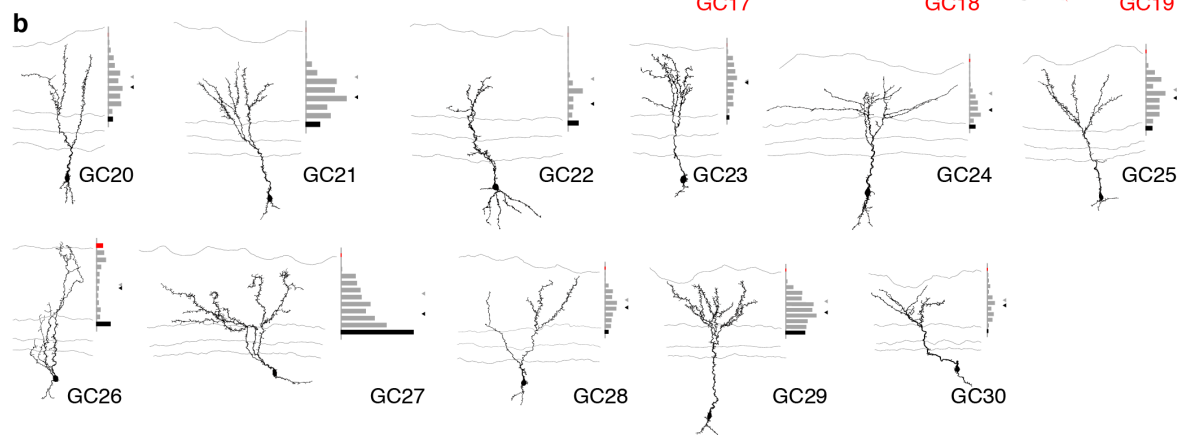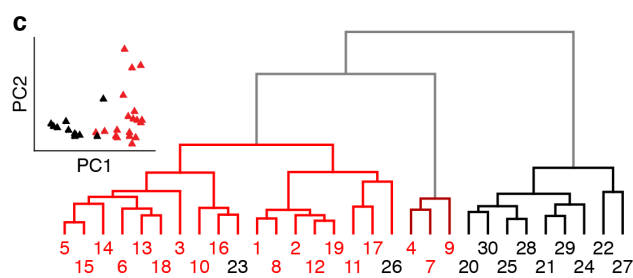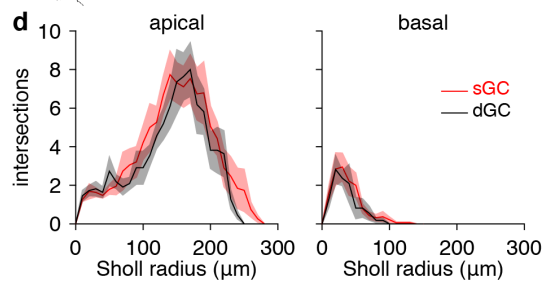

Supplement: supp [file elife-16039-supp-v1.zip]

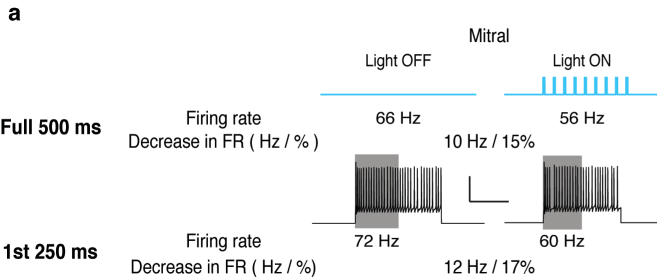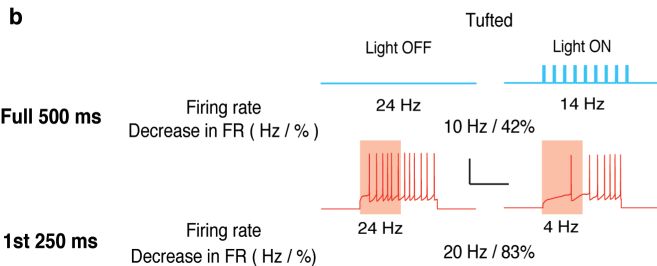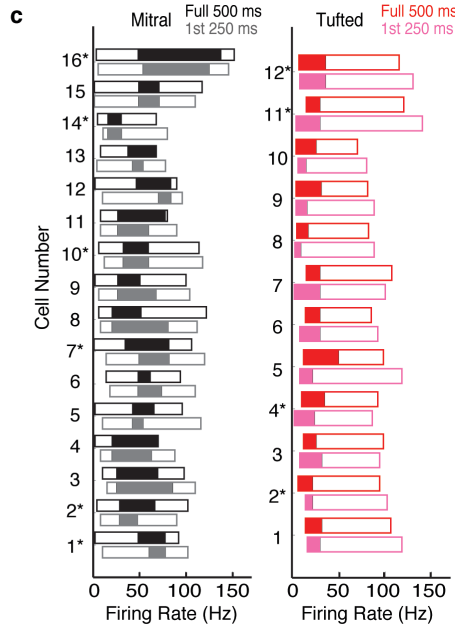

Supplement: supp [file elife-16039-supp-v1.zip]

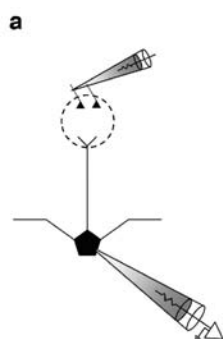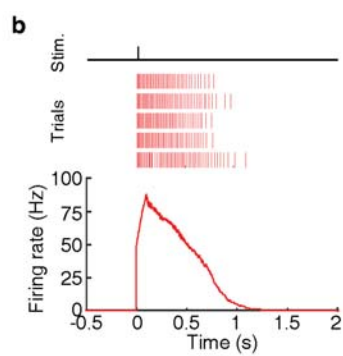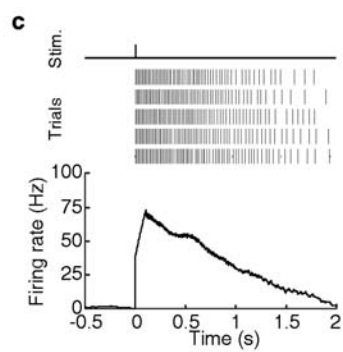

Supplement: supp [file elife-16039-supp-v1.zip]

**a**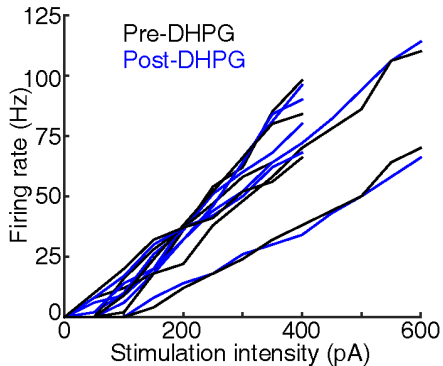**b**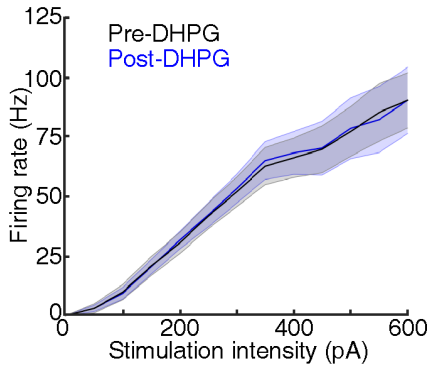

Supplement: supp [file elife-16039-supp-v1.zip]
